1 **SNVstory: A dockerized algorithm for rapid and accurate inference of sub-continental**  
2 **ancestry**

3

4 Audrey E. Bollas<sup>1</sup>, Andrei Rajkovic<sup>1</sup>, Defne Ceyhan<sup>1</sup>, Jeffrey B. Gaither<sup>1</sup>, Elaine R. Mardis<sup>1,2</sup>, Peter  
5 White<sup>1,2,#</sup>

6

7 <sup>1</sup>The Steve and Cindy Rasmussen Institute for Genomic Medicine, The Abigail Wexner Research  
8 Institute, Nationwide Children's Hospital, Columbus, OH USA

9 <sup>2</sup>Department of Pediatrics, The Ohio State University College of Medicine, Columbus, OH USA

10

11 #Corresponding Author:

12 Peter White, Ph.D.

13 The Institute for Genomic Medicine

14 The Abigail Wexner Research Institute

15 Nationwide Children's Hospital

16 575 Children's Crossroad

17 Columbus, OH 43215

18 Phone: +1 (614) 355-2671

19 Email: [peter.white@nationwidechildrens.org](mailto:peter.white@nationwidechildrens.org)

20

21 Keywords: Genetic ancestry prediction, Machine learning, Genetic variation, Model interpretation,

22 Personalized medicine

23

## 24 **Abstract**

25 Knowing a patient's genetic ancestry is crucial in clinical settings, providing benefits such as tailored  
26 genetic testing, targeted health screening based on ancestral disease-predisposition rates, and  
27 personalized medication dosages. However, self-reported ancestry can be subjective, making it  
28 difficult to apply consistently. Moreover, existing approaches utilize genome sequencing data to infer  
29 ancestry at the continental level, creating the need for methods optimized for individual ancestry  
30 assignment. We present SNVstory, a method built upon three independent machine learning models  
31 for accurately inferring the sub-continental ancestry of individuals. SNVstory includes a feature-  
32 importance scheme, unique among open-source ancestral tools, which allows the user to track the  
33 ancestral signal broadcast by a given gene or locus. We apply SNVstory to a clinical dataset,  
34 comparing self-reported ethnicity and race to our inferred genetic ancestry. SNVstory represents a  
35 significant advance in methods to assign genetic ancestry, predicting ancestry across 36 different  
36 populations with high accuracy.

37

## 38 **Introduction**

39 Ancestry derived from genomic data, referred to as genetic ancestry, is a measurable and biologically  
40 defined parameter. Although much of the human genome is identical across all populations, it is  
41 estimated that depending on an individual's ancestry, 0.1% to 0.4% may differ from the human  
42 reference genome. While this genetic variation includes structural variants (SVs), copy number  
43 variants (CNVs), and small insertions or deletions (indels), by far the largest and easiest to detect  
44 category occurs in the form of single nucleotide variants (SNVs), many of which are unique to  
45 genetically distinct populations<sup>1</sup>.

46

47 Knowledge of a patient's genetic ancestry has clinical implications, ranging from genetic testing to  
48 health screening based on ancestral disease-predisposition rates, and in some cases, may inform

49 what medicine dosage to prescribe a patient<sup>2-4</sup>. However, self-reported race is frequently used in the  
50 research and clinical setting and is often inconsistent with genetic ancestry, potentially driving health  
51 disparities<sup>5-8</sup>. Genome sequencing-based diagnostic testing in patients suspected of having a rare  
52 genetic disorder requires accurate data filtering to remove variants common to a given population.  
53 Precise identification of the patient's ancestry improves the identification of rare disease-causal  
54 variants. Therefore, developing methods to report ancestry accurately and consistently is essential.

55  
56 In addition to clinical importance, knowing the ancestral composition of an individual or a population  
57 is essential in the genetic research setting. For example, signals from genome-wide association  
58 studies (GWAS) or whole genome sequencing cohorts can be reassessed based on population  
59 stratification, whereby loci associated with disease may be more accurately identified by discarding  
60 rare variants associated with an individual's ancestry rather than with the disease in question<sup>9,10</sup>.

61  
62 Given the importance of ancestry, several ancestry inference algorithms that operate on genomic  
63 data have been developed that can be divided into two broad types: parametric and non-parametric.  
64 Parametric learning algorithms estimate a finite set of parameters from the data to establish a  
65 relationship between the independent and dependent variables. Two widely-used parametric tools  
66 are STRUCTURE<sup>11</sup> and ADMIXTURE<sup>12</sup>, which estimate the proportions of different ancestries (or  
67 ancestral populations) for each individual, known as admixture. Recently, Archetypal Analysis was  
68 shown to be more computationally efficient and provide more interpretable results than  
69 ADMIXTURE<sup>13</sup>. In contrast, non-parametric methods do not have a finite set of parameters and  
70 instead rely on the intrinsic structure of the data to determine which data points best resemble each  
71 other.

72

73 The emergence of population-scale genome sequencing datasets with a form of self-reported  
74 ancestry allows models to be built with prior knowledge of represented ancestries. In place of  
75 individualized genetic data, large databases house genomic summary results, such as aggregate  
76 variant allele frequencies stratified by population. For example, the Single Nucleotide Polymorphism  
77 database (dbSNP) is the largest genomic aggregate database with 11 different populations from over  
78 one million samples<sup>14</sup>. However, the 11 distinct populations contain a high degree of overlap and  
79 primarily represent continental groupings<sup>15</sup>. The Genome Aggregation Database (gnomAD) is  
80 another aggregate database with allele frequencies from 140,000 subjects from 26 populations<sup>16</sup>. In  
81 addition to these large-scale repositories of aggregate allele frequencies, there exist a few datasets at  
82 the level of the individual, such as the 1000 Genomes Project (1kGP)<sup>1</sup> and the Simons Genome  
83 Diversity Project (SGDP)<sup>17</sup>, which are much smaller in sample size, with 2,504 and 279 samples,  
84 respectively. Nevertheless, the 1kGP and SGDP have been critical in characterizing ancestry and  
85 human history as they contain the most granular population labels.

86

87 Taken together, these curated variant datasets enable an alternative class of models to be used to  
88 predict ancestry based upon samples labeled with known ancestry<sup>18-28</sup>. However, many methods  
89 suffer shortcomings, including not having discrete ancestry labels beyond the main continental  
90 groups or, for those methods using the 1kGP, not considering that many subjects are within the same  
91 families and, therefore, fail to satisfy the principle of independent and identically distributed data. As  
92 such, there is a critical need for methods to accurately predict an individual's genetic ancestry from  
93 genome sequencing data by implementing supervised models.

94

95 Here, we address some limitations surrounding supervised learning of ancestry by developing three  
96 independent models from gnomAD, 1kGP, and SGDP. Our models estimate ancestry from 36 different  
97 populations with high accuracy. Furthermore, we provide software that enables users to run our

98 models on their data, taking the widely accepted variant call format (VCF) files as input and  
99 outputting predictions and a graphical representation of the likelihood of a given genetic ancestry.  
100 As a form of validation, we apply these models to our in-house clinical research dataset and correlate  
101 the estimates with those of self-reported ancestry.

102

## 103 **Materials and Methods**

### 104 **Training Datasets**

105 Genomic datasets from gnomAD, 1kGP, and SGDP were processed separately (**Figure 1**), as described  
106 below. The gnomAD variants are provided on reference genome GRCh37, and the 1kGP and SGDP  
107 were called on reference genome GRCh38.

108

### 109 **The Genome Aggregation Database (gnomAD)**

110 The gnomAD v2.1 exome and genome sequencing variant dataset provides aggregated data from 17  
111 populations, meaning allele frequencies of each population for 17 million exome variants. We  
112 reduced the number of input features for machine learning by following a similar protocol to the one  
113 described by the MacArthur lab by filtering for high call rates, biallelic-only sites, and a frequency  
114 greater than 0.1% (<https://macarthurlab.org/2018/10/17/gnomad-v2-1/>). After this filtering,  
115 81,398 SNVs remained, formatted as a matrix of ancestries and corresponding SNV frequencies.

116

117 To obtain SNV calls for individuals, as is provided in standard VCF format, we simulated individuals  
118 from each ancestry by effectively flipping a weighted coin for each individual and their respective  
119 variant (**Figure 1**). This resulted in a synthetic-based matrix of samples spanning the ancestry  
120 classifications in gnomAD v2.1 and SNVs, coded as reference, heterozygous, or homozygous for each  
121 SNV position. Although this approach does not capture haplotypes, the simulated samples are  
122 genetically typical examples of the chosen ancestry to a first approximation.

123

#### 124 **The 1000 Genomes Project (1kGP)**

125 The New York Genome Center performed genome sequencing (GS) on 3,202 samples, including 602  
126 trios, from the 1kGP cohort at 30x coverage, released in 2020<sup>29</sup>. The data were aligned to GRCh38  
127 using BWA-MEM<sup>30</sup>, and variants were called by GATK *HaplotypeCaller* (GATK version 3.5.0) using  
128 default settings. The dataset contains 126,659,422 SNVs from 26 populations spanning East and  
129 South Asia, North and South America, Africa, and Europe. Sample sizes were not uniformly  
130 represented across the different populations, i.e., the dataset was imbalanced. Due to the high genetic  
131 similarity between individuals from Utah and the United Kingdom, the Utah population was removed  
132 from the analysis.

133

#### 134 **The Simons Genome Diversity Project (SGDP)**

135 The SGDP consists of GS of 300 individuals from seven major population groups, 75 countries, and  
136 142 diverse populations. GS FASTQ files from 279 samples were downloaded from the European  
137 Nucleotide Archive (PRJEB9586). Sequencing reads were aligned to genome assembly GRCh38 using  
138 BWA-MEM. SNV and INDEL calling was performed with GATK version 4.1.9, described below. GATK  
139 *HaplotypeCaller* was run on each sample using the GVCF workflow to generate a per-sample  
140 intermediate GVCF. The GATK *GenotypeGVCFs* function was used to perform base calling across all  
141 samples jointly to obtain genotypes for each sample in VCF format. We then performed variant  
142 recalibration and filtering in the two-stage process using the GATK functions *VariantRecalibration*  
143 and *ApplyVQS*. The final combined data set contained a total of 48,815,712 SNVs.

144

#### 145 **Quality Control**

146 Quality control of the gnomAD (<https://macarthurlab.org/2018/10/17/gnomad-v2-1/>) and 1kGP<sup>29</sup>  
147 were as previously described. For the SGDP dataset, we ran several quality-control tools to detect

148 any issues with sequencing quality and sample contamination. We ran Picard *CollectMultipleMetrics*  
149 on the aligned bam files to collect alignment summary, quality score, and GC bias metrics (**Table S1**).  
150 Sequencing read allocation was calculated using samtools. Coverage information was collected using  
151 mosdepth<sup>31</sup>. The average coverage for all realigned samples was 40X (ranging from 31X to 77X).  
152 Sample contamination level was determined by the number of reads inconsistent with the genotype  
153 in dbSNP<sup>14</sup> sites. One sample was flagged for possible sample contamination (**Supplemental**  
154 **Materials and Methods**).

155

### 156 **Removal of Related Samples**

157 Related samples of the third degree (e.g., first cousins, great grandparents, or great-grandchildren)  
158 or closer were identified by the relationship inference tool, KING<sup>32</sup>. Data from the 1kGP and SDGP  
159 were preprocessed using PLINK2 with the following parameters: “*--new-id-max-allele-len 10000 --*  
160 *max-alleles 2*”<sup>33</sup>. KING recommends performing as little filtering as possible. However, an additional  
161 filtering step was performed to prevent the computation from running out of memory. Therefore, the  
162 analysis was restricted to variants shared by at least two individuals: “*--maf 0.0007*” in the case of the  
163 1kGP and “*--maf 0.0007*” for SDGP. After removing the variants present in only one sample, KING was  
164 executed on the resulting bed file, with the “*--kinship*” option set to report pairwise relatedness  
165 inference. Samples from the analysis were flagged that had a third-degree kinship coefficient cutoff  
166  $\geq 0.0442$ , a value previously established by the authors of KING<sup>32</sup>. Four samples were removed from  
167 further analysis in the SGDP dataset based on the KING relatedness results (**Supplemental Materials**  
168 **and Methods**).

169

170 Because some samples from the 1kGP are related to more than one other individual in the cohort, the  
171 following procedure was implemented to remove the fewest number of samples. Considering only  
172 the relationships with coefficients exceeding the third-degree cutoff, a graph-based method was

173 implemented to recursively identify nodes (samples) with the largest number of edges  
174 (relationships) and remove those nodes until all subgraphs had, at most, a single connection. For  
175 subgraphs with a single connection, one sample was randomly selected from the pair, while all  
176 singletons were included in the list of samples to keep. From 167 samples with at least one close  
177 relationship, 117 were flagged for inclusion in downstream analysis. The remaining samples were  
178 removed with PLINK2.

179

### 180 **Variant Selection and Preprocessing**

181 Variants from 1kGP and SGDP underwent a final filtering step by taking the intersection of targeted  
182 exonic regions of the exome capture reagent used routinely in our clinical lab (IDT xGen Exome Hyb  
183 Panel v2 targets hg38 BED file) with the set of genetic variants from the unrelated individuals using  
184 BEDTools *intersect* (v2.30.0)<sup>34</sup>. The resulting VCF was converted into a numerical encoding  
185 homozygous alternative = 2, heterozygous = 1, reference or missing = 0. The vectors of genotypes  
186 were combined to form a matrix of variants by genotypes. For variant selection from gnomAD, see  
187 the following gnomAD section in Model training and cross-validation below.

188

### 189 **Model Training and Cross-Validation**

190 The models were trained on each dataset separately, as required by their differing labeling strategies  
191 (**Figure 1**).

192

193 **gnomAD:** Because our gnomAD algorithm uses synthetic data, we must consider two parameters: a  
194 population size that balances the model's accuracy with training time and resources and a p-value  
195 from a Chi-Square test that removes uninformative SNVs. This was accomplished using a nested for  
196 loop to iterate over all combinations of population sizes and p-values for SNV removal (**Figure S1**).  
197 For each combination, we generated a set of 80/20 training/validation splits of the data. A Chi-Square



198 test was applied to each SNV (feature) in the training data to determine whether it was informative  
199 for distinguishing ancestry in the population. SNVs were removed that did not meet the p-value  
200 threshold. We used a gradient-boosted decision tree from XGBoost to train the model on the training  
201 set and then test on the validation set<sup>35</sup>. Fold generation and training were performed five times for  
202 each p-value, and the accuracy was averaged to represent the accuracy for each p-value. Once all the  
203 p-values were tested, the p-value with the highest accuracy was selected (**Figure S2**). Then, the  
204 model was retrained on all the data for that specific population size and tested on a synthetic hold-  
205 out set. The accuracy for the hold-out set is representative of that population. A continental model  
206 (population size of 4,084 individuals; SNV p-value threshold of 7.5e-49) was built to predict six  
207 groups: Africa, South Asia, Europe, East Asia, America, and Ashkenazi Jewish. Two sub-continental  
208 classifiers were built to predict ancestry within the East Asian (**Figure S2A**.; population size of  
209 13,593 individuals; SNV p-value threshold of 1.78e-09) and European groups (**Figure S2B**.;  
210 population size of 45,243 individuals; SNV p-value threshold of 1.78e-24).

211

212 **1kGP:** For the 1kGP dataset, the support vector machine (SVM) library from scikit-learn<sup>36</sup> was used  
213 to train a classifier to predict the continental groups: Africa, Europe, South Asia, East Asia, and  
214 America. In addition, multiple classifiers were trained independently for each sub-continental group,  
215 i.e., Kenya or African Caribbean in Barbados. All SVMs were trained using the radial basis function  
216 (RBF) kernel and with the gamma parameter fixed as the default. Hyperparameter tuning of the C  
217 penalty term was accomplished by performing cross-validation using the scikit-learn stratified k-fold  
218 library. The default five splits were chosen, and the shuffle variable was set to true. The F1 macro  
219 average was selected to represent a model's performance.

220

221 **SGDP:** The SVM library from scikit-learn was used to train the model for the SGDP dataset. Stratified  
222 k-fold cross-validation was performed using the standard scikit-learn library. Seven continental

223 groups were predicted from this cohort (Africa, West Eurasia, East Asia, South Asia, Oceania, Central  
224 Asia Siberia, and America), as the subcontinental groups needed more samples per group to train an  
225 accurate model. The F1 macro average was chosen as a representation of a model's performance to  
226 account for the imbalanced data.

227

## 228 **Results**

### 229 **Model Performance**

230 We report the performance of the gnomAD, 1kGP, and SGDP continental models using external  
231 validation sets (**Figure 2A-F**), and cross-validation results on the subcontinental models (**Figures S2**  
232 **and S3**) were performed because additional datasets with the same subcontinental labels were not  
233 available.

234

235 Confusion matrices are shown in **Figures 2A-D**, providing the ancestry prediction for each sample in  
236 the validation data. In the 1kGP and SGDP models, we see some discrepancies between the European  
237 and American groups. In the case of the 1kGP model (**Figure 2A**), some SGDP samples labeled as  
238 European are predicted to be American. Similarly, in the SGDP model, some 1kGP samples labeled as  
239 American are predicted as European. This may be due to a higher similarity of the feature space  
240 between European and American samples than other groups (**Figure S3**). The gnomAD model is  
241 validated with 1kGP (**Figure 2C**) and SGDP (**Figure 2D**) samples. Overall, all continental models have  
242 a high area under the curve in both ROC (**Figure 2E**) and Precision-Recall (**Figure 2F**) curves,  
243 described in the figure legend.

244

245 The gnomAD East Asian and European subcontinental models have accuracies of 99.90% and  
246 80.92%, respectively (**Figure S2A, B**). The results for the 1kGP subcontinental model are obtained  
247 by averaging the probabilities for each sample across cross-validation folds and then computing the

248 confusion matrix (**Figure S4**). The accuracies for the 1kGP subcontinental models are as follows:  
249 Africa, 90.26%; America, 93.06%; East Asia, 87.23%; Europe, 94.29%; South Asia, 85.86%.

250

## 251 **Feature Interpretation**

252 Feature importance for the gnomAD continental model was calculated using SHAP<sup>37</sup> values to  
253 provide insight into which SNVs and their corresponding genes have the most impact on the model  
254 predictions. SHAP values for the 1kGP and SGDP models were not calculated because the memory  
255 requirement for the kernel explainer was too high due to the number of features in the models.

256

257 Global feature importance for the gnomAD continental model is reported by aggregating SHAP values  
258 across each gene and taking the mean absolute value of each gene across 2,800 of the training  
259 samples (**Figure S5**). The 'knownCanonical' genes table was downloaded from the UCSC Table  
260 Browser using assembly GRCh37 to get the genomic interval for each gene. If a region contains  
261 multiple genes, we combine the genes to form a non-overlapping genomic interval (e.g., ANKRD45,  
262 TEX50). Of the 77,402 variants used to train the model, 3,231 were not located in gene regions and  
263 were removed from further analysis. The most significant gene impacting the model is Keratin  
264 Associated Protein 19-8. Samples with a variant in this gene are more likely to be predicted as  
265 American.

266

267 We also aggregated SHAP values across larger cytoloactions to visualize which regions across the  
268 genome are most impactful in the model predictions (accessed using this file:  
269 <https://hgdownload.soe.ucsc.edu/goldenPath/hg19/database/cytoBand.txt.gz>). **Figure S6** shows  
270 the feature importance for an individual from the training data labeled as African. Regions are  
271 colored by population label with the maximum absolute SHAP value. Regions that have the most

272 impact on predicting the sample African are ‘chromosome 1: 172,900,000-176,000,000’ and  
273 ‘chromosome 5: 63,200,000\_66,700,000’.

274

## 275 **Comparison of Genetic vs. Self-Reported Ancestry in Clinical Samples**

276 SNVstory was implemented on an in-house dataset of clinical exome sequencing testing from 293  
277 individuals generated by the Institute for Genomic Medicine Clinical Laboratory to demonstrate the  
278 application of our models. We compare the model predictions to the self-reported ancestry of the  
279 proband (**Table S2**). Self-reported race is derived from the paternal/maternal ethnic background.  
280 Ethnicity is categorized into one of three groups: Non-Hispanic or Latino, Hispanic or Latino, and  
281 Unknown/Not Reported Ethnicity. Race is classified into one of five groups: White, Asian, Bi-  
282 racial/Multi-racial, Black or African American, and Unknown/Unspecified. Due to the broadness of  
283 these categories, we report the comparison between predicted genetic ancestry for the continental  
284 models only (**Table 1**).

285

286 Most of the individuals share agreement between genetic ancestry and ethnicity/race, e.g., for those  
287 predicted to be European, a match of White / Non-Hispanic or Latino for race /ethnicity occurs in  
288 92.5%, 96.7%, and 89.1% of individuals by the gnomAD (**Table 1A**), 1kGP (**Table 1B**), and SGDP  
289 (**Table 1C**) models, respectively. However, several cases exist where individuals are self-reported as  
290 White while having a different genetic ancestry across multiple models, and vice versa. Additionally,  
291 13 of our cases have either Unknown/Not Reported Ethnicity or Unknown/Unspecified Race. As  
292 discussed in the Introduction, the ability to refine or add genetic ancestry information in these cases  
293 is helpful for added diagnostic precision in variant filtering/prioritization.

294

## 295 **Model Interpretation for Indeterminant Samples**

296 Most of our in-house dataset has agreement across all three continental models (81.9% of samples)  
297 and even more across at least two continental models (98.0%). A disproportionate number of  
298 individuals share disagreement across all three models between those that are self-reported as Bi-  
299 racial or Multi-racial vs. those that are White, Asian, Black or African American (50% vs. 9%  
300 disagreement, respectively). Those individuals with Unknown/Unspecified Race are not included in  
301 this calculation. These results suggest our models have worse performance on admixed samples,  
302 where two or more populations may be present. In reporting results, we use the label with the highest  
303 probability. Some discrepancies between model results may be mitigated by adding a minimum  
304 threshold on the probability required to obtain a result.

305

### 306 **Individualized Ancestry Report**

307 Here, we illustrate the ability of SNVstory to provide ancestry predictions in an easily visualized  
308 format for individual samples (**Figure 3**). The probabilities for the gnomAD and the 1kGP continental  
309 models were 100% European, while the SGDP continental model was 95% West Eurasia. The  
310 gnomAD subcontinental model has the highest probability (48%) for North-Western European  
311 (nfe\_nwe), and the 1kGP subcontinental model has the highest probability (100%) for British From  
312 England and Scotland (eur\_gbr). The subcontinental model probabilities are weighted by the  
313 continental probabilities, which are returned as 0% probability for the remaining models. These  
314 predictions agree with the true sample ancestry taken from the 1kGP validation set.

315

### 316 **Discussion**

317 We have described a method to predict ancestry from genomic data that provides multiple  
318 improvements over existing ancestry inference tools. Firstly, SNVstory incorporates  
319 samples/variants from three different curated datasets, expanding the number of labels and the  
320 granularity of the model classification beyond the main continental divisions. Secondly, drawing

321 upon the gnomAD database produces a much larger number of variants on which our models were  
322 trained, providing the opportunity to classify ancestry on a wider (or more diverse) range of features.  
323 Thirdly, SNVstory excludes consanguineous samples from training, ensuring that the  
324 overrepresentation of closely related individuals does not bias the model. Finally, our novel  
325 implementation is optimized for individualized results rather than clustering large cohorts of  
326 samples into shared ancestral groups.

327

328 In our gnomAD model, we introduce a method to simulate individual samples from aggregate allele  
329 frequencies of a known population. This is potentially useful for any study requiring access to  
330 reference variants from a population where data from individual samples is obfuscated. One  
331 limitation in our approach is that we did not account for linkage disequilibrium between variants  
332 when simulating individual samples. This could result in some samples with patterns of variants that  
333 do not exist in actual samples. An improvement in future models would be to remove variants with  
334 high levels of linkage disequilibrium between them. If high recognizability to actual samples is  
335 required, established metrics of linkage disequilibrium, such as the correlation coefficient  $r^2$ , could  
336 be used to measure the ‘realness’ of a simulated sample based on existing variant patterns, and  
337 simulated VCFs could be validated based on this quality. However, in practice, the larger pool of  
338 variants provided by gnomAD more than compensates for the lost dependence among proximal  
339 groups of variants. We have demonstrated that the performance of the gnomAD models with  
340 simulated individuals is comparable to that of models trained with actual samples.

341

342 With the growing number of reference datasets containing individuals from diverse ancestral  
343 backgrounds, it is possible to build ancestry prediction models that reflect these populations.  
344 However, there is room for improvement, as our most diverse dataset (SGDP) includes the fewest  
345 samples. We could not build subcontinental models as granular as the labels provided because there

346 were as few as two samples per label for many instances. Additionally, our model cannot accurately  
347 predict ancestry proportions in samples with admixed ancestry. Most admixture prediction software  
348 depends on a priori knowledge of the number of non-admixed populations and requires  
349 representation from such populations. There is limited availability of reference samples from  
350 admixed individuals, so our training data lacked representation from any admixed samples. Efforts  
351 to expand the number of reference sequences for diverse and admixed populations will provide  
352 opportunities to fill this gap.

353  
354 SNVstory's feature-importance capacity is unique among ancestral tools and could have significant  
355 clinical utility. The clinical application of most ancestral prediction tools is limited to simply  
356 predicting the patient's ancestry. However, SNVstory's unique capability to describe a given locus as  
357 characteristic, or atypical, of a given ancestry could lead to improved prioritization of variants. For  
358 example, SNVstory finds the most ancestrally informative gene on average to be KRTAP19-8, which  
359 is greatly enriched for SNVs predictive of Native American/Latino ancestry (**Figure S5**). This gene is  
360 a known driver of thyroid lymphoma<sup>38</sup>, a disorder that is the second-most-common type of cancer  
361 among Hispanic women<sup>39</sup> but not even among the top five cancer types among women worldwide<sup>40</sup>.  
362 The inferred distinctiveness of Latino copies of KRTAP19-8 suggests that rare founder mutations in  
363 this gene may contribute to increased rates of thyroid cancer among women of Hispanic ancestry.  
364 The ability to target variants in genes inherited from specific populations adds a new tool to the  
365 diagnostician's toolkit and could lead to improved patient outcomes.

366  
367 Finally, our approach allows users to reliably execute our models given a single-sample or multi-  
368 sample VCF, with results tailored toward ancestry assignment for an individual sample. This provides  
369 immediately useful ancestry information in the clinical setting, where ancestry can be used to inform  
370 diagnostic or therapeutic decisions. Specifically, a subject's ancestry can be used to help prioritize

371 variants that may be rare in one population but not another. In the clinical setting, it may be essential  
372 to recognize the difference between ethnicity, race, and genetic ancestry in determining the optimal  
373 therapy or drug dosage.

374

375 Given the widespread availability of genome sequencing data and models like SNVstory that can  
376 accurately predict ancestry, we advocate for genetic ancestry to become the standard classification  
377 reported for genetic studies and clinical applications, where appropriate. Genetic ancestry offers  
378 enormous advantages over other self-reported information, such as ethnicity or race, because it  
379 supplies biological characteristics of a population and is consistently measurable. This advantage will  
380 only increase as more populations are sequenced and ancestry prediction becomes more reliable,  
381 and we improve our ability to contextualize the impact of genetic ancestry on clinical decision-  
382 making.

383

#### 384 **Acknowledgments**

385 We thank the Nationwide Foundation Pediatric Innovation Fund for generously supporting this  
386 project.

387

#### 388 **Author Contributions**

389 AB and AR processed data and trained models for gnomAD, 1kGP, and SGDP. AR designed the  
390 methods to simulate data from gnomAD allele frequencies and cross-validation architecture. AB and  
391 DC prepared figures and tables. AB wrote the first draft of the paper. JG, DC, AR, and PW assisted in  
392 preparing or revising the paper. AR and AB wrote the SNVstory software package. PW and EM  
393 supervised the project.

394

#### 395 **Data Availability**



396 The training data for our model are available as follows. gnomAD v2.1 data is available from  
397 <https://gnomad.broadinstitute.org/downloads/>. 1000 Genomes Project data is shared via the  
398 International Genome Sample Resource and can be accessed from  
399 <https://www.internationalgenome.org/data-portal/data-collection/30x-grch38>. Simons Genome  
400 Diversity Project data is available from the European Nucleotide Archive under project PRJEB9586.  
401 SNVstory is an open-source model and is available from <https://github.com/nch-igm/snvstory>.

402

### 403 **Funding**

404 This work was supported by the Nationwide Children’s Foundation and The Abigail Wexner Research  
405 Institute at Nationwide Children’s. The funders had no role in study design, data collection, data  
406 analysis, the decision to publish, or manuscript preparation.

407

### 408 **Ethics Approval and Consent to Participate**

409 This study was reviewed and approved by the Institutional Review Board (IRB) of The Abigail  
410 Wexner Research Institute at Nationwide Children's Hospital (Office for Human Research Protections  
411 (OHRP) IORG0000326; IRB00000568) as IRB17-00206 (“Institute for Genomic Medicine  
412 Comprehensive Profiling for Cancer, Blood, and Somatic Disorders”). The participant’s legal  
413 guardian/next of kin provided written informed consent to participate in this study.

414

### 415 **Competing Interests**

416 No Competing interests: Audrey Bollas, Andrei Rajkovic, Defne Ceyhan, Jeffrey Gaither, and Peter  
417 White. Elaine Mardis: Qiagen N.V., supervisory board member, honorarium, and stock-based  
418 compensation. Singular Genomics Systems, Inc., board of directors, honorarium, and stock-based  
419 compensation.

420

## 421 References

- 422 1. Auton, A., Abecasis, G.R., Altshuler, D.M., Durbin, R.M., Abecasis, G.R., Bentley, D.R., Chakravarti,  
423 A., Clark, A.G., Donnelly, P., Eichler, E.E., et al. (2015). A global reference for human genetic  
424 variation. *Nature* 526, 68–74. [10.1038/nature15393](https://doi.org/10.1038/nature15393).
- 425 2. Hauser, D., Obeng, A.O., Fei, K., Ramos, M.A., and Horowitz, C.R. (2018). Views Of Primary Care  
426 Providers On Testing Patients For Genetic Risks For Common Chronic Diseases. *Health Aff. Proj.*  
427 *Hope* 37, 793–800. [10.1377/hlthaff.2017.1548](https://doi.org/10.1377/hlthaff.2017.1548).
- 428 3. Jorde, L.B., and Bamshad, M.J. (2020). Genetic Ancestry Testing What Is It and Why Is It  
429 Important? *JAMA* 323, 1089–1090. [10.1001/jama.2020.0517](https://doi.org/10.1001/jama.2020.0517).
- 430 4. Ramamoorthy, A., Pacanowski, M.A., Bull, J., and Zhang, L. (2015). Racial/ethnic differences in  
431 drug disposition and response: review of recently approved drugs. *Clin. Pharmacol. Ther.* 97,  
432 263–273. [10.1002/cpt.61](https://doi.org/10.1002/cpt.61).
- 433 5. Fujimura, J.H., and Rajagopalan, R. (2011). Different differences: The use of ‘genetic ancestry’  
434 versus race in biomedical human genetic research. *Soc. Stud. Sci.* 41, 5–30.
- 435 6. Shraga, R., Yarnall, S., Elango, S., Manoharan, A., Rodriguez, S.A., Bristow, S.L., Kumar, N.,  
436 Niknazar, M., Hoffman, D., Ghadir, S., et al. (2017). Evaluating genetic ancestry and self-reported  
437 ethnicity in the context of carrier screening. *BMC Genet.* 18, 99. [10.1186/s12863-017-0570-y](https://doi.org/10.1186/s12863-017-0570-y).
- 438 7. Mersha, T.B., and Abebe, T. (2015). Self-reported race/ethnicity in the age of genomic research:  
439 its potential impact on understanding health disparities. *Hum. Genomics* 9, 1. [10.1186/s40246-](https://doi.org/10.1186/s40246-014-0023-x)  
440 [014-0023-x](https://doi.org/10.1186/s40246-014-0023-x).
- 441 8. Gomes, M.B., Gabrielli, A.B., Santos, D.C., Pizarro, M.H., Barros, B.S.V., Negrato, C.A., Dib, S.A.,  
442 Porto, L.C., and Silva, D.A. (2018). Self-reported color-race and genomic ancestry in an admixed  
443 population: A contribution of a nationwide survey in patients with type 1 diabetes in Brazil.  
444 *Diabetes Res. Clin. Pract.* 140, 245–252. [10.1016/j.diabres.2018.03.021](https://doi.org/10.1016/j.diabres.2018.03.021).
- 445 9. Brown, R., Lee, H., Eskin, A., Kichaev, G., Lohmueller, K.E., Reversade, B., Nelson, S.F., and  
446 Pasaniuc, B. (2016). Leveraging ancestry to improve causal variant identification in exome  
447 sequencing for monogenic disorders. *Eur. J. Hum. Genet.* 24, 113–119. [10.1038/ejhg.2015.68](https://doi.org/10.1038/ejhg.2015.68).
- 448 10. Purcell, S.M., Wray, N.R., Stone, J.L., Visscher, P.M., O’Donovan, M.C., Sullivan, P.F., Sklar, P.,  
449 Purcell (Leader), S.M., Stone, J.L., Sullivan, P.F., et al. (2009). Common polygenic variation  
450 contributes to risk of schizophrenia and bipolar disorder. *Nature* 460, 748–752.  
451 [10.1038/nature08185](https://doi.org/10.1038/nature08185).
- 452 11. Pritchard, J.K., Stephens, M., and Donnelly, P. (2000). Inference of population structure using  
453 multilocus genotype data. *Genetics* 155, 945–959. [10.1093/genetics/155.2.945](https://doi.org/10.1093/genetics/155.2.945).
- 454 12. Alexander, D.H., Novembre, J., and Lange, K. (2009). Fast model-based estimation of ancestry in  
455 unrelated individuals. *Genome Res.* 19, 1655–1664. [10.1101/gr.094052.109](https://doi.org/10.1101/gr.094052.109).
- 456 13. Gimbernat-Mayol, J., Mantes, A.D., Bustamante, C.D., Montserrat, D.M., and Ioannidis, A.G.  
457 (2022). Archetypal Analysis for population genetics. *PLoS Comput. Biol.* 18, e1010301.  
458 [10.1371/journal.pcbi.1010301](https://doi.org/10.1371/journal.pcbi.1010301).

- 459 14. Sherry, S.T., Ward, M.-H., Kholodov, M., Baker, J., Phan, L., Smigielski, E.M., and Sirotkin, K.  
460 (2001). dbSNP: the NCBI database of genetic variation. *Nucleic Acids Res.* 29, 308–311.
- 461 15. Jin, Y., Schaffer, A.A., Feolo, M., Holmes, J.B., and Kattman, B.L. (2019). GRAF-pop: A Fast  
462 Distance-Based Method To Infer Subject Ancestry from Multiple Genotype Datasets Without  
463 Principal Components Analysis. *G3 Bethesda Md* 9, 2447–2461. 10.1534/g3.118.200925.
- 464 16. Karczewski, K.J., Francioli, L.C., Tiao, G., Cummings, B.B., Alföldi, J., Wang, Q., Collins, R.L.,  
465 Laricchia, K.M., Ganna, A., Birnbaum, D.P., et al. (2020). The mutational constraint spectrum  
466 quantified from variation in 141,456 humans. *Nature* 581, 434–443. 10.1038/s41586-020-  
467 2308-7.
- 468 17. Mallick, S., Li, H., Lipson, M., Mathieson, I., Gymrek, M., Racimo, F., Zhao, M., Chennagiri, N.,  
469 Nordenfelt, S., Tandon, A., et al. (2016). The Simons Genome Diversity Project: 300 genomes  
470 from 142 diverse populations. *Nature* 538, 201–206. 10.1038/nature18964.
- 471 18. Kumar, A., Montserrat, D.M., Bustamante, C., and Ioannidis, A. (2020). XGMix: Local-Ancestry  
472 Inference with Stacked XGBoost (Genomics) 10.1101/2020.04.21.053876.
- 473 19. Maples, B.K., Gravel, S., Kenny, E.E., and Bustamante, C.D. (2013). RFMix: A Discriminative  
474 Modeling Approach for Rapid and Robust Local-Ancestry Inference. *Am. J. Hum. Genet.* 93, 278–  
475 288. 10.1016/j.ajhg.2013.06.020.
- 476 20. Sheehan, S., and Song, Y.S. (2016). Deep Learning for Population Genetic Inference. *PLOS*  
477 *Comput. Biol.* 12, e1004845. 10.1371/journal.pcbi.1004845.
- 478 21. Hwa, H.-L., Wu, M.-Y., Lin, C.-P., Hsieh, W.H., Yin, H.-I., Lee, T.-T., and Lee, J.C.-I. (2019). A single  
479 nucleotide polymorphism panel for individual identification and ancestry assignment in  
480 Caucasians and four East and Southeast Asian populations using a machine learning classifier.  
481 *Forensic Sci. Med. Pathol.* 15, 67–74. 10.1007/s12024-018-0071-y.
- 482 22. Durand, E.Y., Do, C.B., Mountain, J.L., and Macpherson, J.M. (2014). Ancestry Composition: A  
483 Novel, Efficient Pipeline for Ancestry Deconvolution (Bioinformatics) 10.1101/010512.
- 484 23. Chu, B.B., Sobel, E.M., Wasiolek, R., Ko, S., Sinsheimer, J.S., Zhou, H., and Lange, K. (2021). A fast  
485 Data-Driven method for genotype imputation, phasing, and local ancestry inference:  
486 MendelImpute.jl. *Bioinforma. Oxf. Engl.*, btab489. 10.1093/bioinformatics/btab489.
- 487 24. Shi, G., and Kuang, Q. (2021). Ancestral Spectrum Analysis With Population-Specific Variants.  
488 *Front. Genet.* 12.
- 489 25. Wang, Y., Song, S., Schraiber, J.G., Sedghifar, A., Byrnes, J.K., Turissini, D.A., Hong, E.L., Ball, C.A.,  
490 and Noto, K. (2021). Ancestry inference using reference labeled clusters of haplotypes. *BMC*  
491 *Bioinformatics* 22, 459. 10.1186/s12859-021-04350-x.
- 492 26. Soumare, H., Rezgui, S., Gmati, N., and Benkahla, A. (2021). New neural network classification  
493 method for individuals ancestry prediction from SNPs data. *BioData Min.* 14, 30.  
494 10.1186/s13040-021-00258-7.
- 495 27. Dalfovo, D., and Romanel, A. (2023). Analysis of Genetic Ancestry from NGS Data Using EthSEQ.  
496 *Curr. Protoc.* 3, e663. 10.1002/cpz1.663.

- 497 28. Karim, M.R., Cochez, M., Zappa, A., Sahay, R., Beyan, O., Schuhmann, D.-R., and Decker, S. (2020).  
498 Convolutional Embedded Networks for Population Scale Clustering and Bio-ancestry  
499 Inferencing.
- 500 29. Byrska-Bishop, M., Evani, U.S., Zhao, X., Basile, A.O., Regier, A.A., Corvelo, A., Clarke, W.E.,  
501 Musunuri, R., Fairley, S., Runnels, A., et al. High coverage whole genome sequencing of the  
502 expanded 1000 Genomes Project cohort including 602 trios. 45.
- 503 30. Li, H. (2013). Aligning sequence reads, clone sequences and assembly contigs with BWA-MEM.  
504 10.48550/arXiv.1303.3997.
- 505 31. Pedersen, B.S., and Quinlan, A.R. (2018). Mosdepth: quick coverage calculation for genomes and  
506 exomes. *Bioinformatics* 34, 867–868. 10.1093/bioinformatics/btx699.
- 507 32. Manichaikul, A., Mychaleckyj, J.C., Rich, S.S., Daly, K., Sale, M., and Chen, W.-M. (2010). Robust  
508 relationship inference in genome-wide association studies. *Bioinformatics* 26, 2867–2873.  
509 10.1093/bioinformatics/btq559.
- 510 33. Chang, C.C., Chow, C.C., Tellier, L.C., Vattikuti, S., Purcell, S.M., and Lee, J.J. (2015). Second-  
511 generation PLINK: rising to the challenge of larger and richer datasets. *GigaScience* 4, s13742-  
512 015-0047-0048. 10.1186/s13742-015-0047-8.
- 513 34. Quinlan, A.R., and Hall, I.M. (2010). BEDTools: a flexible suite of utilities for comparing genomic  
514 features. *Bioinformatics* 26, 841–842. 10.1093/bioinformatics/btq033.
- 515 35. Chen, T., and Guestrin, C. (2016). XGBoost: A Scalable Tree Boosting System. In Proceedings of  
516 the 22nd ACM SIGKDD International Conference on Knowledge Discovery and Data Mining, pp.  
517 785–794. 10.1145/2939672.2939785.
- 518 36. Pedregosa, F., Varoquaux, G., Gramfort, A., Michel, V., Thirion, B., Grisel, O., Blondel, M.,  
519 Prettenhofer, P., Weiss, R., Dubourg, V., et al. (2011). Scikit-learn: Machine Learning in Python. *J.*  
520 *Mach. Learn. Res.* 12, 2825–2830.
- 521 37. Lundberg, S., and Lee, S.-I. (2017). A Unified Approach to Interpreting Model Predictions.  
522 10.48550/arXiv.1705.07874.
- 523 38. Qiu, K., Li, K., Zeng, T., Liao, Y., Min, J., Zhang, N., Peng, M., Kong, W., and Chen, L. (2021).  
524 Integrative Analyses of Genes Associated with Hashimoto’s Thyroiditis. *J. Immunol. Res.* 2021,  
525 8263829. 10.1155/2021/8263829.
- 526 39. Estrada-Florez, A.P., Bohórquez, M.E., Sahasrabudhe, R., Prieto, R., Lott, P., Duque, C.S., Donado,  
527 J., Mateus, G., Bolaños, F., Vélez, A., et al. (2016). Clinical features of Hispanic thyroid cancer  
528 cases and the role of known genetic variants on disease risk. *Medicine (Baltimore)* 95, e4148.  
529 10.1097/MD.0000000000004148.
- 530 40. Ferlay, J., Colombet, M., Soerjomataram, I., Parkin, D.M., Piñeros, M., Znaor, A., and Bray, F.  
531 (2021). Cancer statistics for the year 2020: An overview. *Int. J. Cancer.* 10.1002/ijc.33588.

532

533

534 **Figure Titles and Legends**

535 **Figure 1. Schematic of ancestry inference model strategy.** The workflow visualizes each dataset  
536 separately with colored boxes and arrows: gnomAD (blue), 1kGP (yellow), and SGDP (red). For the  
537 gnomAD synthetic-based matrix, allele frequencies for each variant for each population given in  
538 gnomAD are used to create a distribution of reference, heterozygous and homozygous alleles for each  
539 population. A matrix format is created by converting the distributions into 0's, 1's, and 2's for each  
540 locus for samples in each population. For 1kGP and SGDP, a matrix format is built directly from  
541 variants in the VCF. For the model architecture, continental model labels are shown in white boxes,  
542 and the number of labels in the corresponding subcontinental models is below in brackets.

543

544 **Figure 2. Continental ancestry inference model performance.** A-D. Confusion matrices of the  
545 1kGP model using SGDP as validation (A), SGDP model using 1kGP as validation (B), gnomAD model  
546 using 1kGP as validation (C), and gnomAD model using SGDP as validation (D). E. Macro-averaged  
547 ROC curves. F. Macro-averaged precision-recall curves.

548

549 **Figure 3. SNVstory ancestry report.** The representative output of model results from SNVstory for  
550 a European sample taken from the 1kGP dataset.

551 **Tables**

552 **Table 1. Genetic ancestry versus self-reported ethnicity and race.** Value counts of genetic  
 553 ancestry model predictions trained using gnomad **(A)**, 1kGP **(B)**, and SGDP **(C)** compared to self-  
 554 reported ethnicity and race.

555 **A. gnomAD**

| <b>Model Labels</b>    | <b>Ethnicity</b>               | <b>Race</b>               | <b>Counts</b> |
|------------------------|--------------------------------|---------------------------|---------------|
| afr                    | Non-Hispanic or Latino         | Black or African American | 20            |
|                        |                                | Bi-racial/Multi-racial    | 10            |
|                        | Unknown/Not Reported Ethnicity | Bi-racial/Multi-racial    | 3             |
|                        | Hispanic or Latino             | Bi-racial/Multi-racial    | 2             |
|                        |                                | White                     | 1             |
| Non-Hispanic or Latino | White                          | 1                         |               |
| amr                    | Hispanic or Latino             | White                     | 8             |
|                        |                                | Unknown/Unspecified       | 5             |
|                        |                                | Black or African American | 2             |
|                        | Non-Hispanic or Latino         | White                     | 1             |
| Hispanic or Latino     | Bi-racial/Multi-racial         | 1                         |               |
| asj                    | Non-Hispanic or Latino         | White                     | 1             |
| eas                    | Non-Hispanic or Latino         | Asian                     | 3             |
|                        |                                | White                     | 2             |
|                        | Hispanic or Latino             | Bi-racial/Multi-racial    | 1             |
| eur                    | Non-Hispanic or Latino         | White                     | 210           |
|                        |                                | Bi-racial/Multi-racial    | 5             |
|                        | Hispanic or Latino             | Bi-racial/Multi-racial    | 5             |
|                        |                                | White                     | 3             |
|                        | Unknown/Not Reported Ethnicity | White                     | 3             |
|                        |                                | Bi-racial/Multi-racial    | 1             |
| Hispanic or Latino     | Unknown/Unspecified            | 1                         |               |
| sas                    | Non-Hispanic or Latino         | Asian                     | 3             |
|                        |                                | White                     | 1             |

556

557 **B. 1kGP**

| <b>Model Labels</b> | <b>Ethnicity</b>               | <b>Race</b>               | <b>Counts</b> |
|---------------------|--------------------------------|---------------------------|---------------|
| afr                 | Non-Hispanic or Latino         | Black or African American | 19            |
|                     |                                | Bi-racial/Multi-racial    | 2             |
|                     | Hispanic or Latino             | Bi-racial/Multi-racial    | 1             |
|                     | Unknown/Not Reported Ethnicity | Bi-racial/Multi-racial    | 1             |
| amr                 | Hispanic or Latino             | White                     | 12            |
|                     | Non-Hispanic or Latino         | Bi-racial/Multi-racial    | 10            |
|                     | Hispanic or Latino             | Bi-racial/Multi-racial    | 8             |
|                     | Non-Hispanic or Latino         | White                     | 8             |
|                     | Hispanic or Latino             | Unknown/Unspecified       | 6             |
|                     | Hispanic or Latino             | Black or African American | 2             |
|                     | Unknown/Not Reported Ethnicity | Bi-racial/Multi-racial    | 2             |
|                     | Non-Hispanic or Latino         | Black or African American | 1             |
| eas                 | Non-Hispanic or Latino         | Asian                     | 3             |
| eur                 | Non-Hispanic or Latino         | White                     | 207           |
|                     | Unknown/Not Reported Ethnicity | White                     | 3             |
|                     | Non-Hispanic or Latino         | Bi-racial/Multi-racial    | 3             |
|                     | Unknown/Not Reported Ethnicity | Bi-racial/Multi-racial    | 1             |
| sas                 | Non-Hispanic or Latino         | Asian                     | 3             |
|                     |                                | White                     | 1             |

558

559 **C. SGDP**

| <b>Model Labels</b>    | <b>Ethnicity</b>               | <b>Race</b>               | <b>Counts</b> |
|------------------------|--------------------------------|---------------------------|---------------|
| Africa                 | Non-Hispanic or Latino         | Black or African American | 20            |
|                        |                                | Bi-racial/Multi-racial    | 9             |
|                        | Hispanic or Latino             | Bi-racial/Multi-racial    | 3             |
|                        | Unknown/Not Reported Ethnicity | Bi-racial/Multi-racial    | 3             |
|                        | Hispanic or Latino             | Black or African American | 2             |
| CentralAsiaSiberia     | Non-Hispanic or Latino         | White                     | 1             |
|                        |                                | Unknown/Unspecified       | 3             |
| EastAsia               | Non-Hispanic or Latino         | Asian                     | 3             |
| SouthAsia              | Hispanic or Latino             | White                     | 4             |
|                        | Non-Hispanic or Latino         | Asian                     | 3             |
|                        |                                | White                     | 3             |
| WestEurasia            | Non-Hispanic or Latino         | White                     | 212           |
|                        | Hispanic or Latino             | White                     | 7             |
|                        | Non-Hispanic or Latino         | Bi-racial/Multi-racial    | 6             |
|                        | Hispanic or Latino             | Bi-racial/Multi-racial    | 6             |
|                        |                                | Unknown/Unspecified       | 3             |
|                        | Unknown/Not Reported Ethnicity | White                     | 3             |
| Bi-racial/Multi-racial |                                | 1                         |               |

560



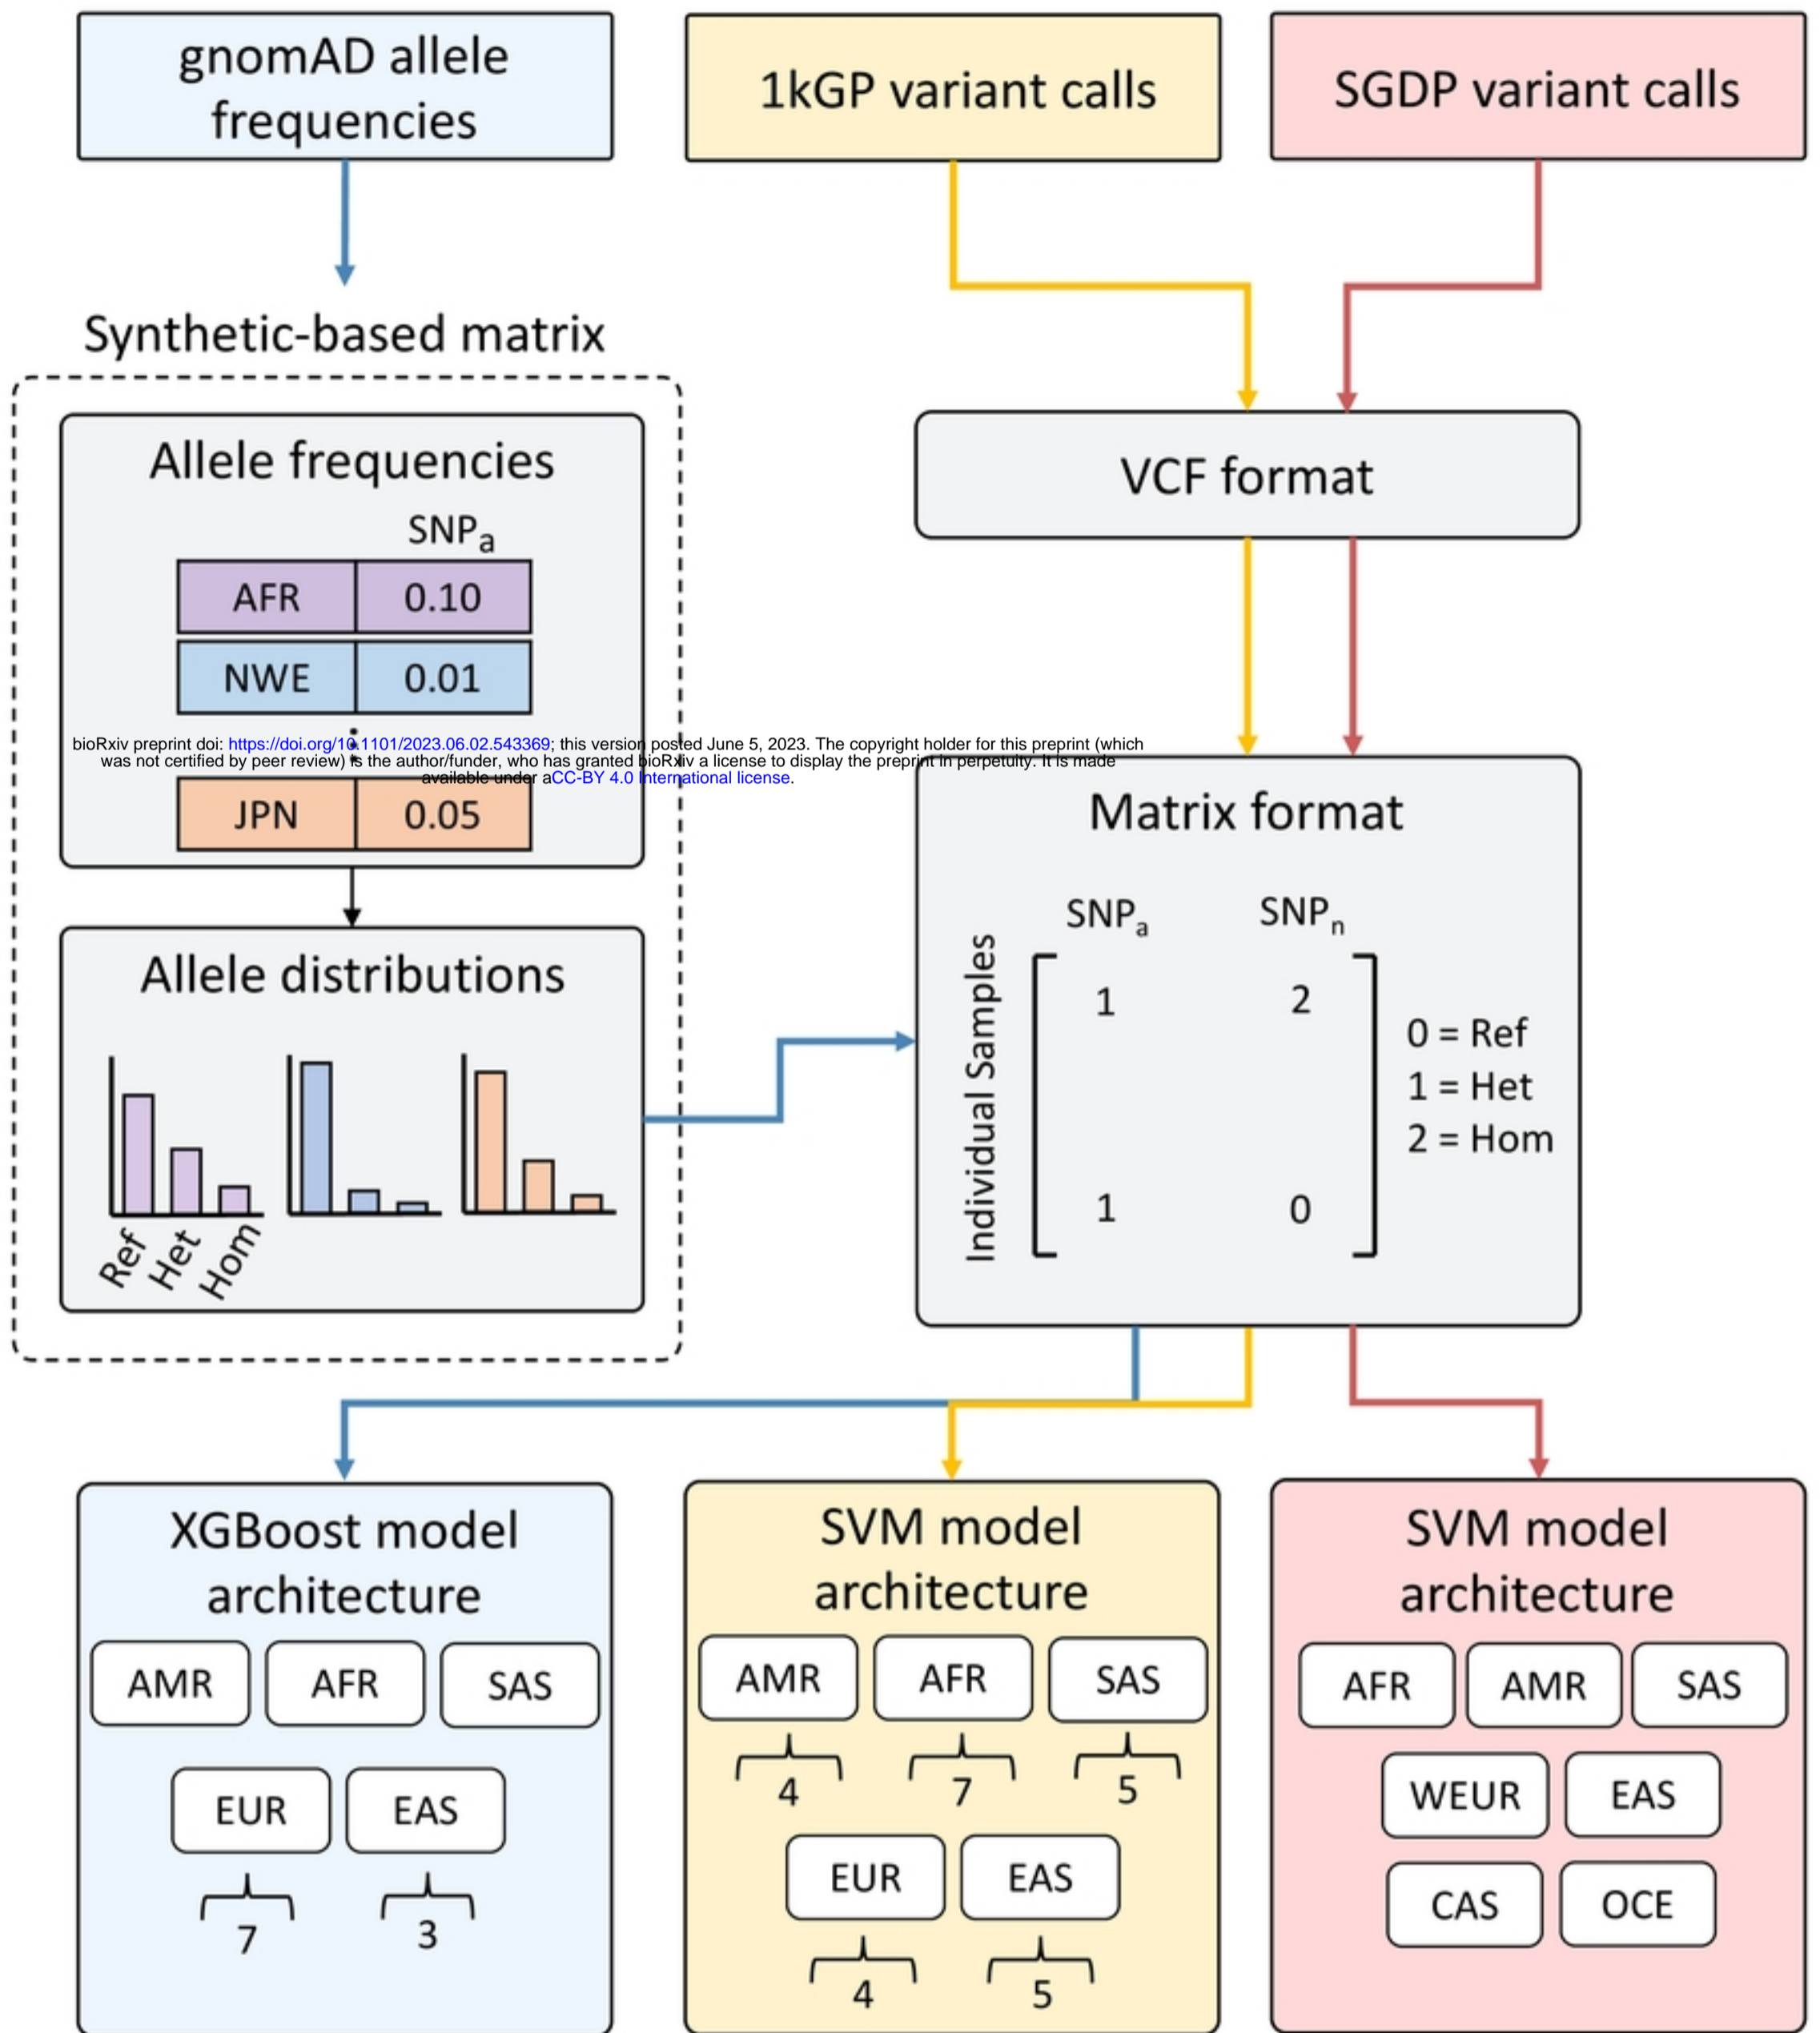

Figure 1

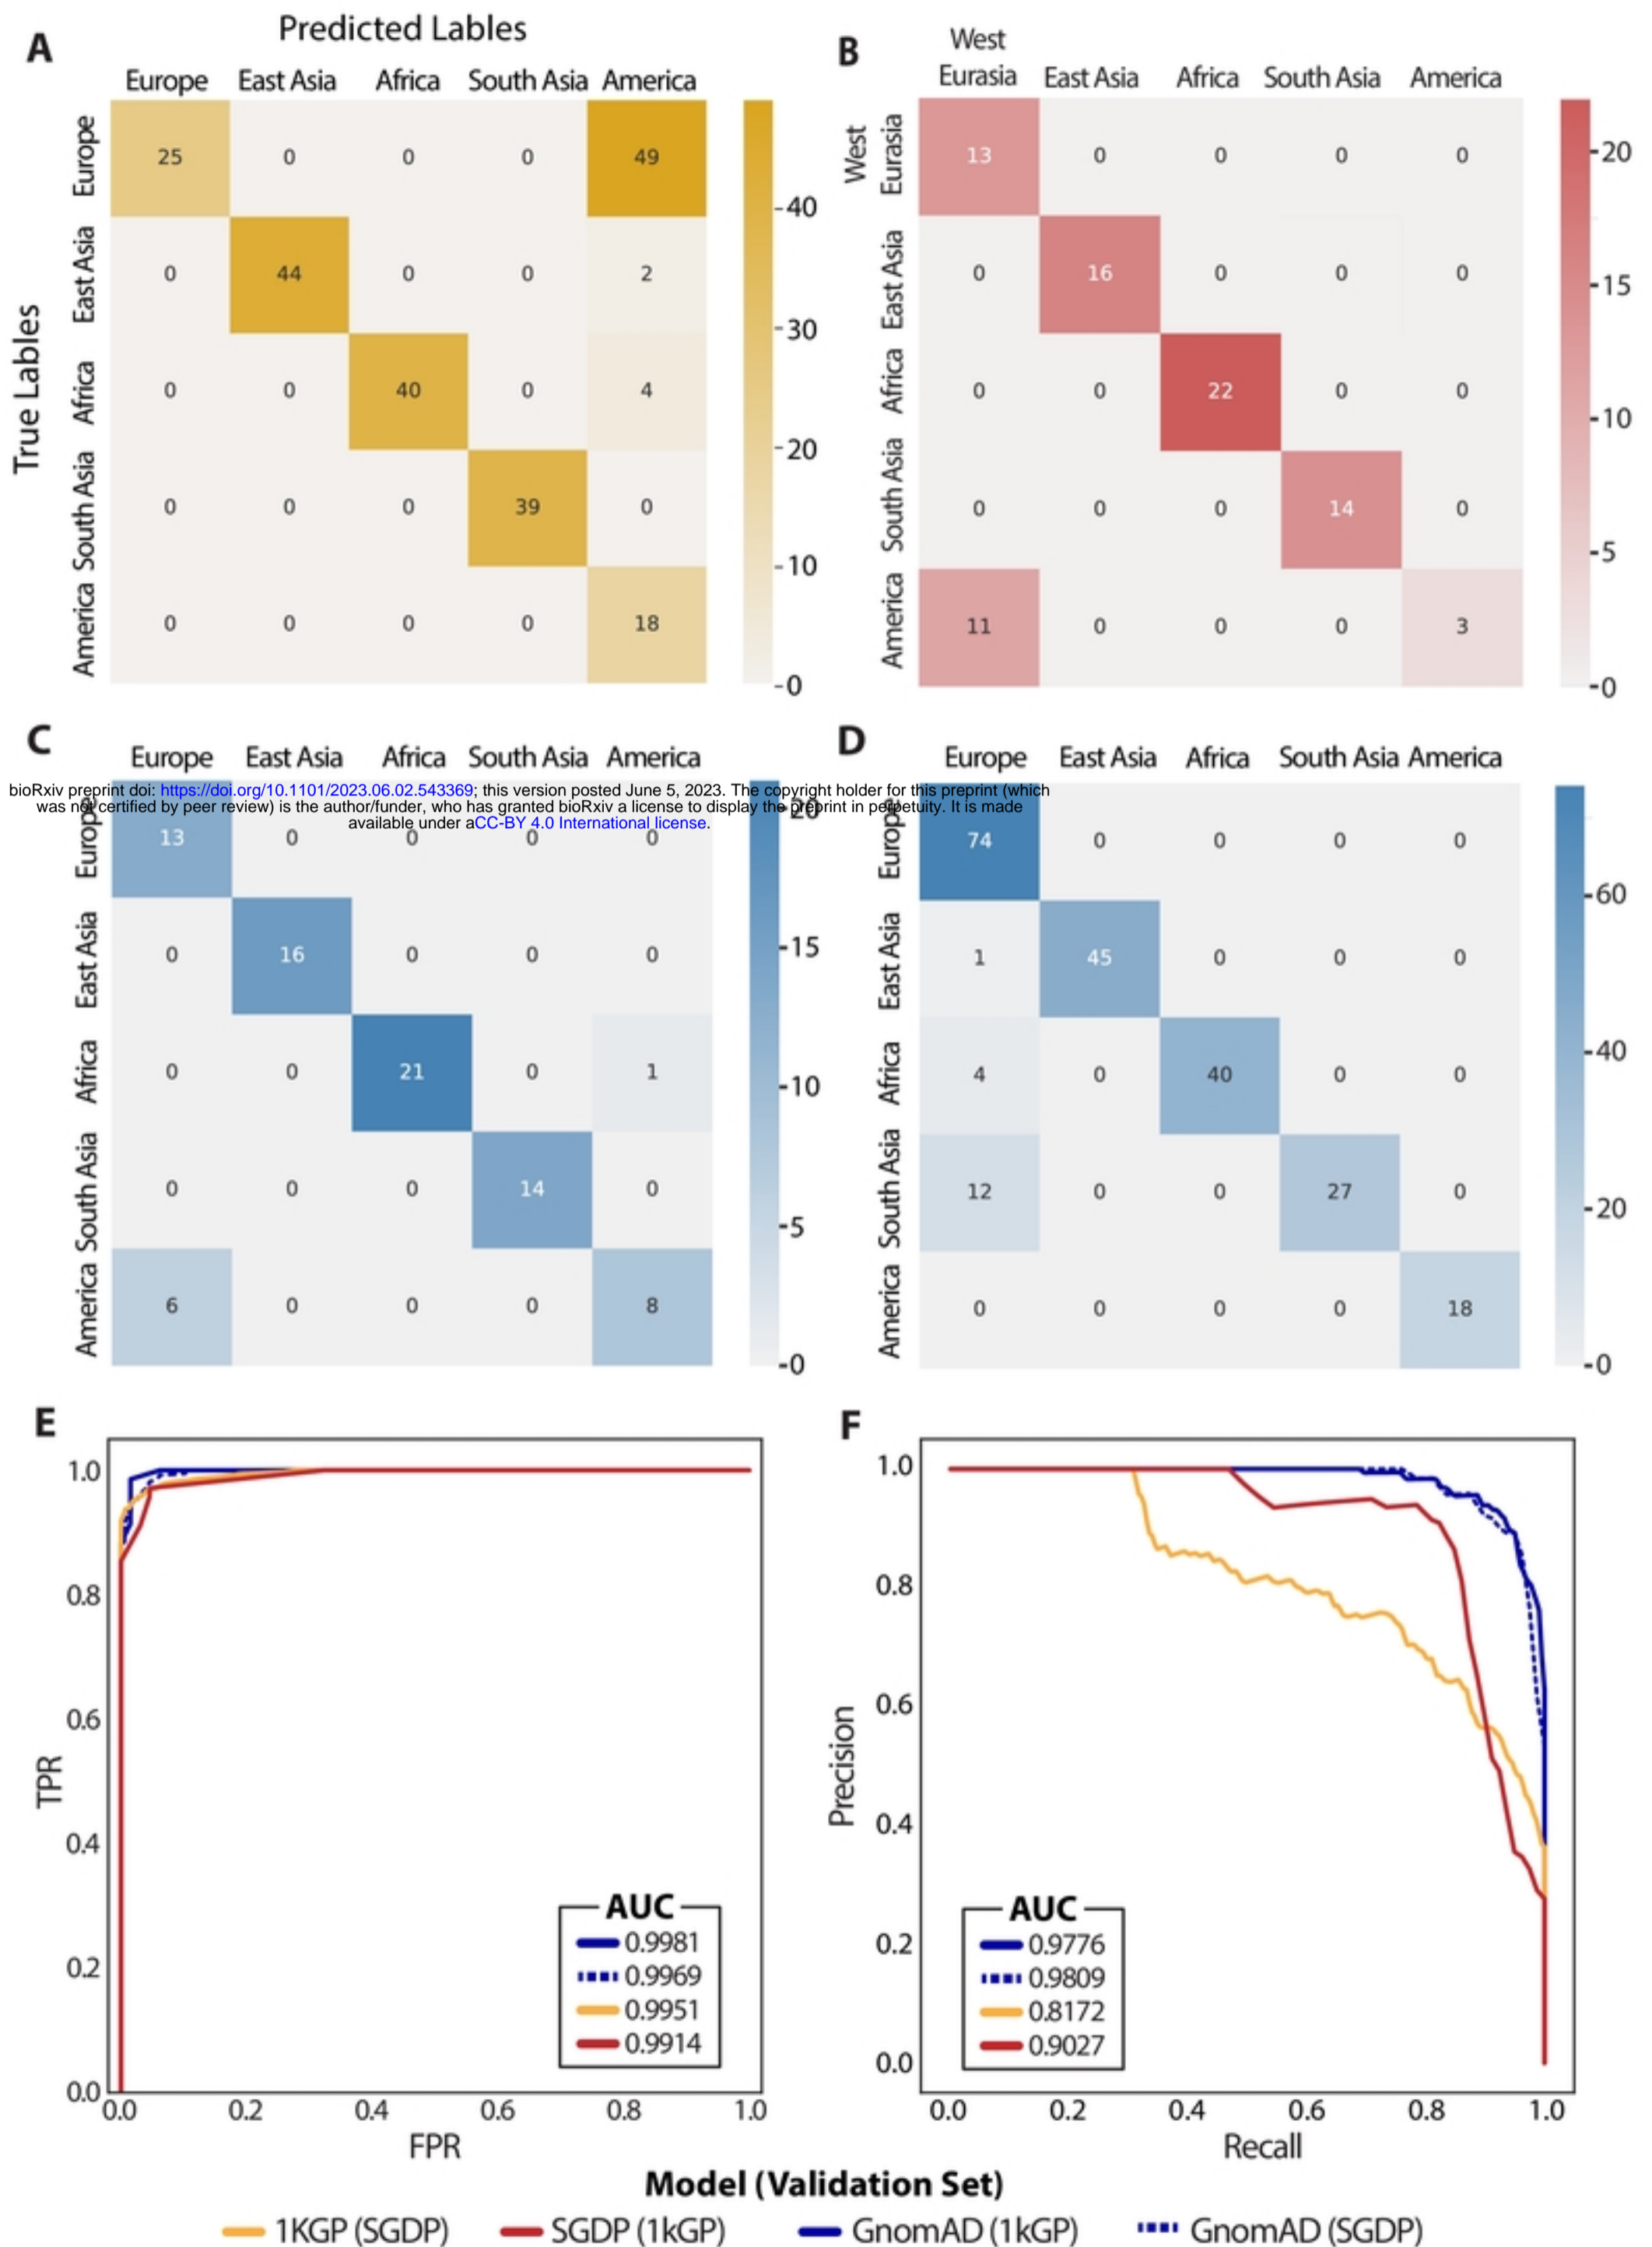

Figure 2

# HG00096

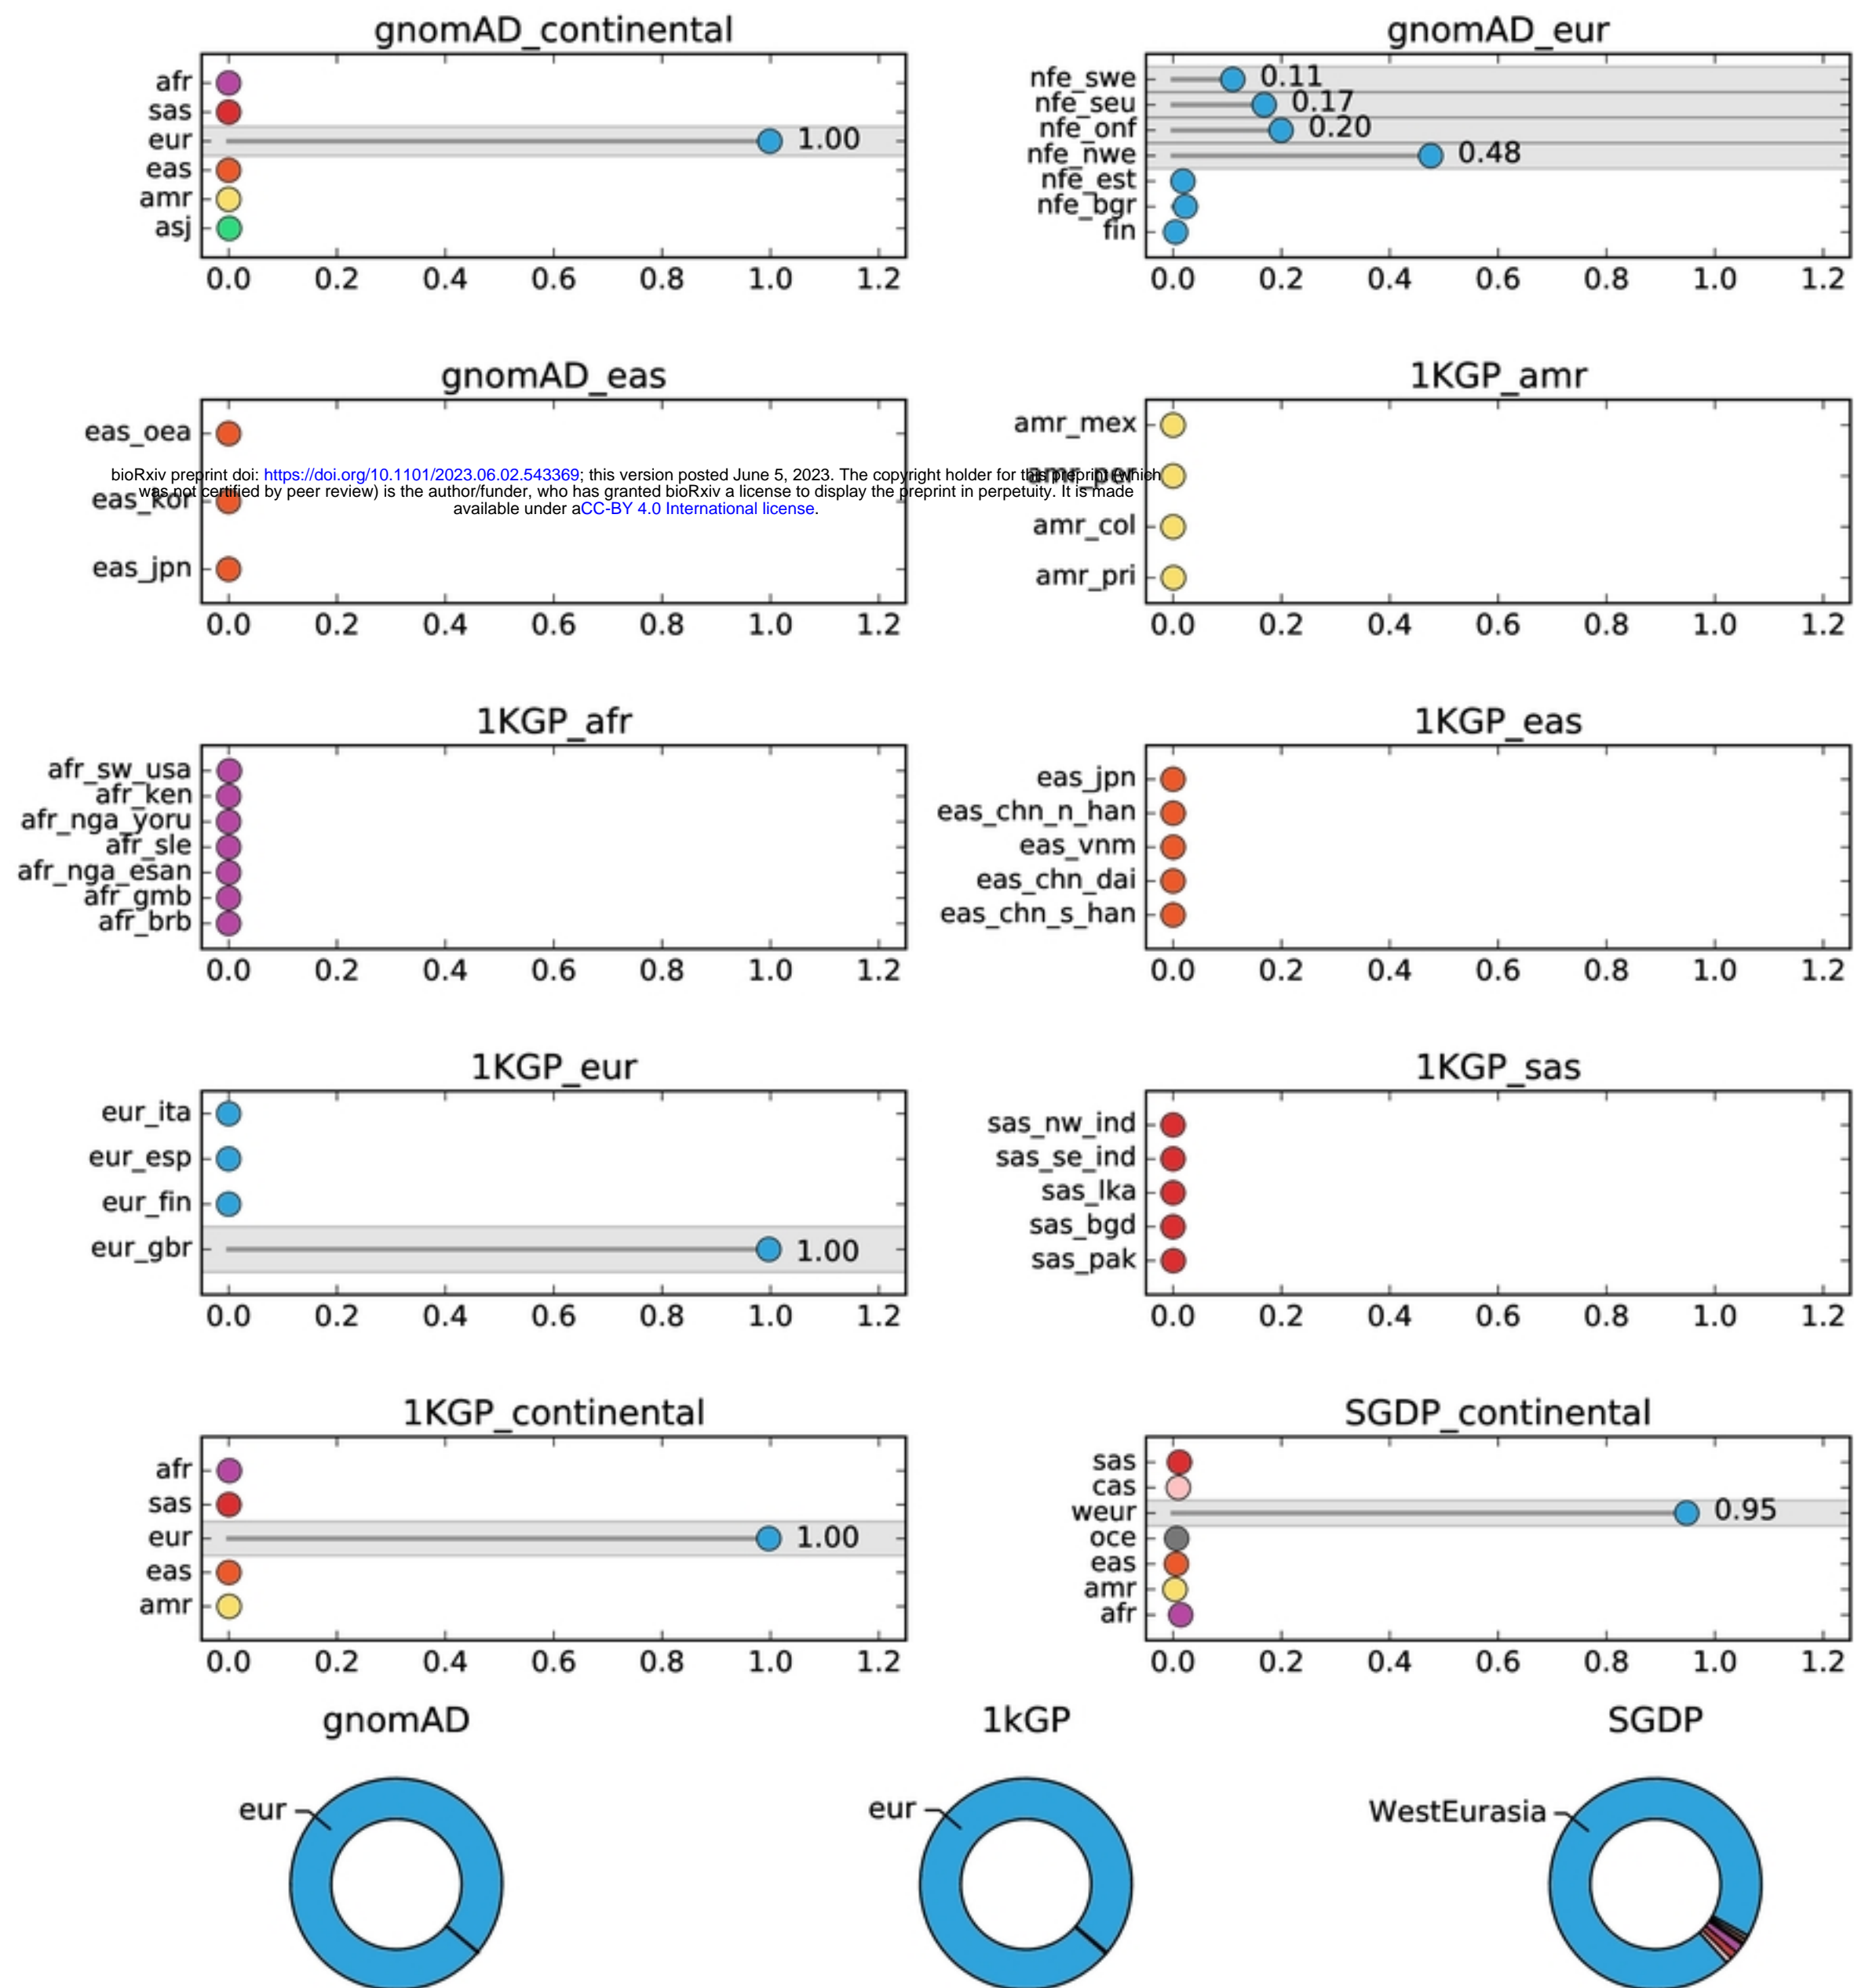

Figure 3
